# Supplementary material for: Patient-Reported Outcomes as Early Indicators of Disease Progression and Predictors of Survival via Machine Learning in Breast Cancer
Source: Research Square preprint supplement (doi:10.21203/rs.3.rs-8013336/v1), 2025-11-13
Supplement: Supplementary file 1 [file bd0cd28bb11b096f61d7e123.docx]

**Patient-Reported Outcomes as Early Indicators of Disease Progression and Predictors of Survival via Machine Learning in Breast Cancer**

**Supplementary Files**

**Supplementary Tables 1-2**

**Supplementary Figures 1-4**

**Supplementary Table 1.** Data missingness by the EORTC QLQ-C30 items.

| **EORTC QLQ-C30 Items** | **Available** | **Missing** | **Proportion (%)** |
| --- | --- | --- | --- |
| Q1. Do you have any trouble doing strenuous activities, like carrying a heavy shopping bag or a suitcase? | 15,031 | 259 | 1.72 |
| Q2. Do you have any trouble taking a long walk? | 15,033 | 257 | 1.71 |
| Q3. Do you have any trouble taking a short walk outside of the house? | 14,997 | 293 | 1.95 |
| Q4. Do you need to stay in bed or a chair during the day? | 15,021 | 269 | 1.79 |
| Q5. Do you need help with eating, dressing, washing  yourself or using the toilet? | 15,080 | 210 | 1.39 |
| Q6. Were you limited in doing either your work or other daily activities? | 15,081 | 209 | 1.39 |
| Q7. Were you limited in pursuing your hobbies or other  leisure time activities? | 14,998 | 292 | 1.95 |
| Q8. Were you short of breath? | 15,030 | 260 | 1.73 |
| Q9. Have you had pain? | 15,016 | 274 | 1.82 |
| Q10. Did you need to rest? | 15,028 | 262 | 1.74 |
| Q11. Have you had trouble sleeping? | 15,058 | 232 | 1.54 |
| Q12. Have you felt weak? | 15,040 | 250 | 1.66 |
| Q13. Have you lacked appetite? | 15,086 | 204 | 1.35 |
| Q14. Have you felt nauseated? | 15,063 | 227 | 1.51 |
| Q15. Have you vomited? | 15,050 | 240 | 1.59 |
| Q16. Have you been constipated? | 15,029 | 261 | 1.74 |
| Q17. Have you had diarrhea? | 14,971 | 319 | 2.13 |
| Q18. Were you tired? | 14,959 | 331 | 2.21 |
| Q19. Did pain interfere with your daily activities? | 14,944 | 346 | 2.32 |
| Q20. Have you had difficulty in concentrating on things,  like reading a newspaper or watching television? | 15,003 | 287 | 1.91 |
| Q21. Did you feel tense? | 14,991 | 299 | 1.99 |
| Q22. Did you worry? | 14,998 | 292 | 1.95 |
| Q23. Did you feel irritable? | 14,990 | 300 | 2.00 |
| Q24. Did you feel depressed? | 14,927 | 363 | 2.43 |
| Q25. Have you had difficulty remembering things? | 14,979 | 311 | 2.08 |
| Q26. Has your physical condition or medical treatment  interfered with your family life? | 14,913 | 377 | 2.53 |
| Q27. Has your physical condition or medical treatment  interfered with your social activities? | 14,972 | 318 | 2.12 |
| Q28. Has your physical condition or medical treatment  caused you financial difficulties? | 14,985 | 305 | 2.04 |
| Q29. How would you rate your overall health during the past week?* | 14,945 | 345 | 2.31 |
| Q30. How would you rate your overall quality of life during the past week?* | 14,929 | 361 | 2.42 |

*Items 1 to 28 responses range from 1 to 4, where 1 = Not at all, 2 = A little, 3 = Quite a bit, and 4 = Very much. Items 29 and 30 are scored on a 7-point scale, ranging from 1 = Very poor to 7 = Excellent.

**Supplementary Table 2. PRO subscales calculation from EORTC QLQ-C30 items.**

| PRO Subscale | Range | EORTC QLQ-C30 Items* |
| --- | --- | --- |
| *Symptom scales/QoL scale* | | |
| Global health status/QOL | 6 | Q29, Q30 |
| Fatigue | 3 | Q10, Q12, Q18 |
| Nausea/Vomit | 3 | Q14, Q15 |
| Pain | 3 | Q9, Q19 |
| Dyspnea | 3 | Q8 |
| Insomnia | 3 | Q11 |
| Appetite loss | 3 | Q13 |
| Constipation | 3 | Q16 |
| Diarrhea | 3 | Q17 |
| Financial difficulties | 3 | Q28 |
| *Functional Scales* | | |
| Physical functioning | 3 | Q1, Q2, Q3, Q4, Q5 |
| Role functioning | 3 | Q6, Q7 |
| Emotional functioning | 3 | Q21, Q22, Q23, Q24 |
| Cognitive functioning | 3 | Q20, Q25 |
| Social functioning | 3 | Q26, Q27 |

*Each item questions can be found in Supplementary Table 1.


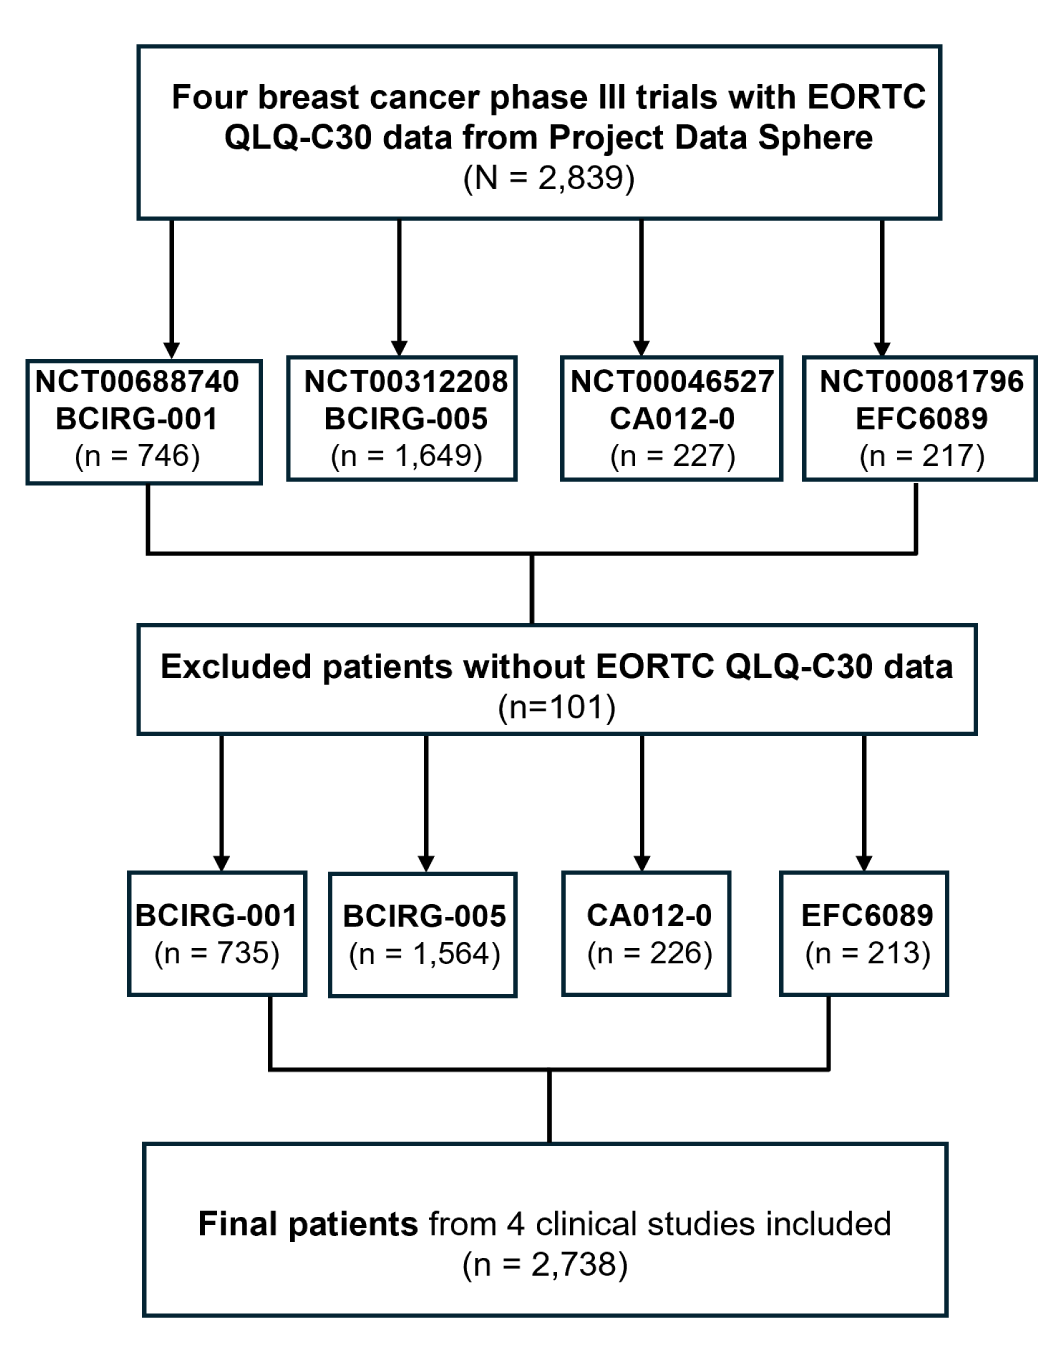


**Supplementary Figure 1.** Workflow for data inclusion and exclusion in the analysis.


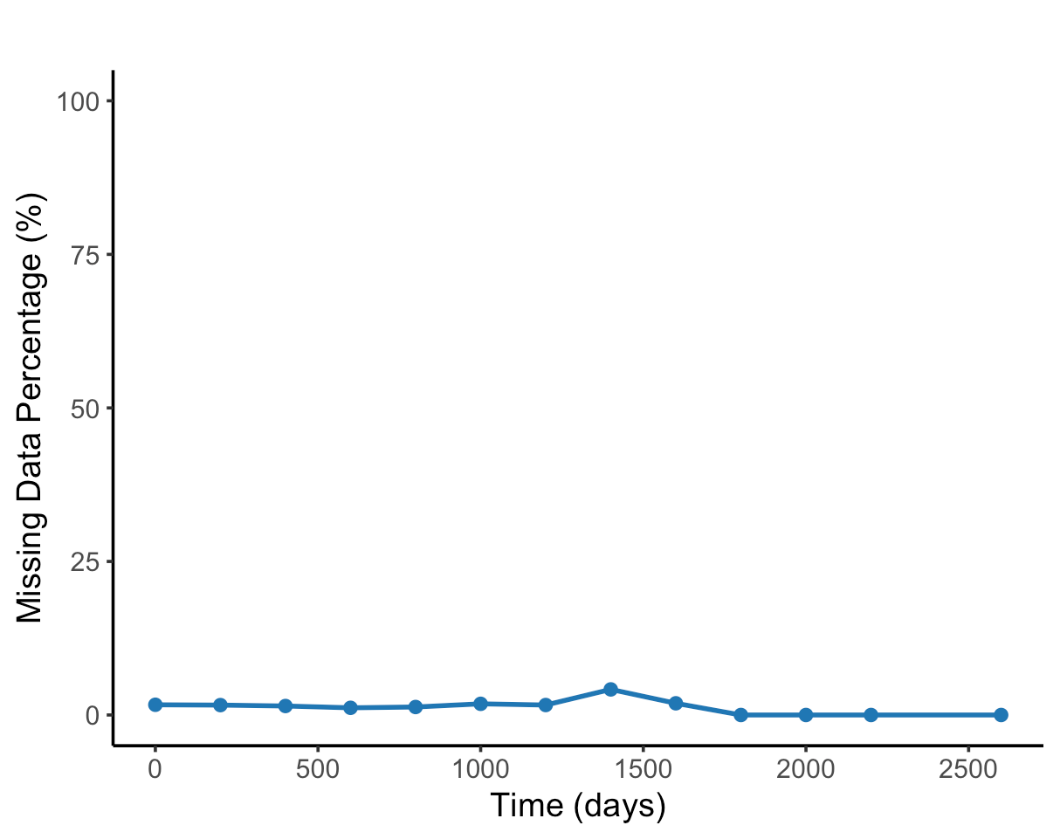


**Supplementary Figure 2.** Percentage of missing data change over time.


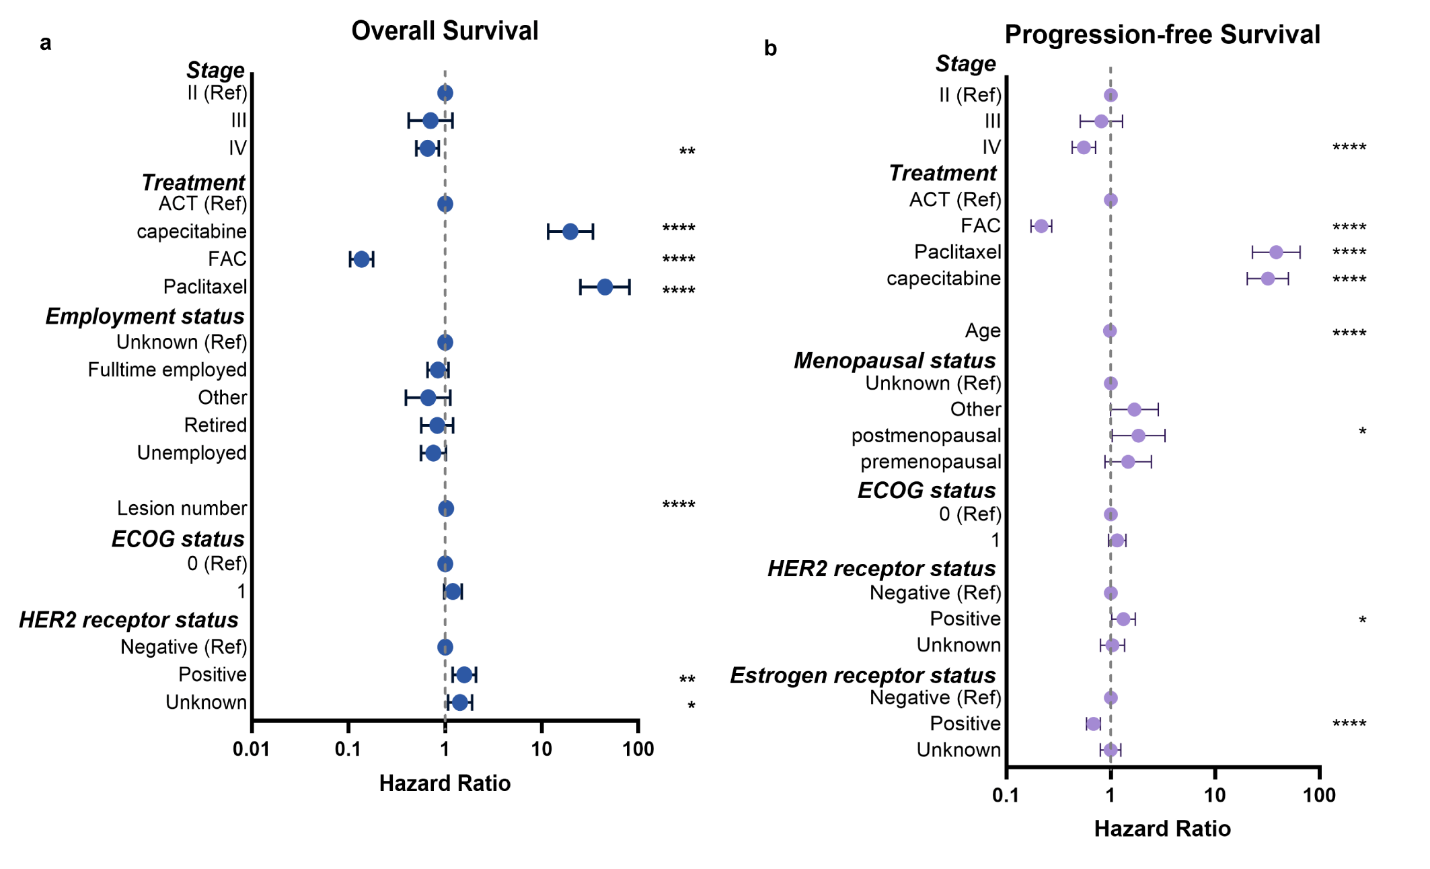


**Supplementary Figure 3.** Forest plots of LASSO-select baseline demographics and clinical characteristics that are associated with overall survival (**a**) or progression-free survival (**b**). Circles indicate hazard ratios, with bars representing 95% confidence intervals. The significance level p-values were shown as: *, p < 0.05; **, p < 0.01; ***, p < 0.001; ****, p < 0.0001.


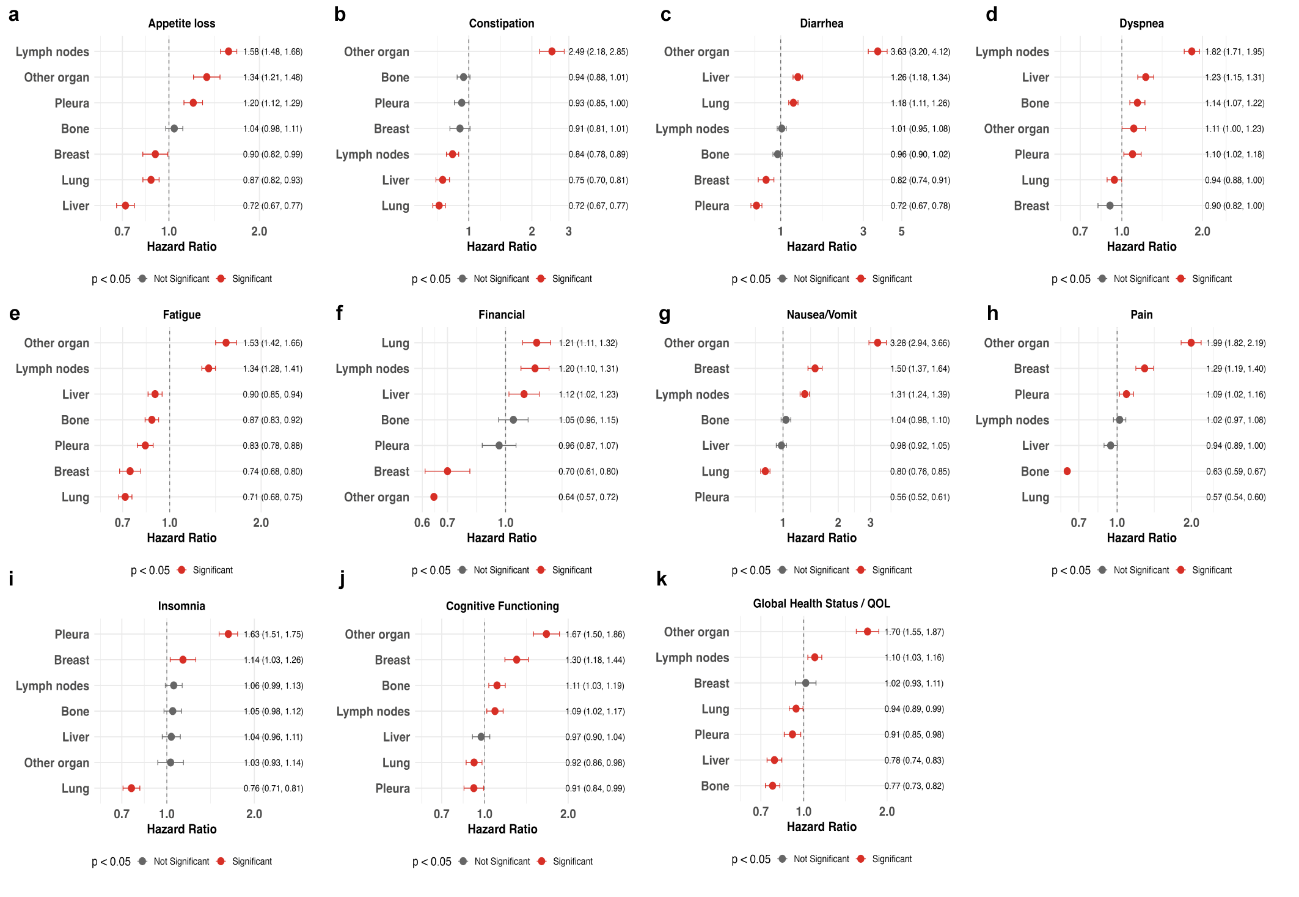
 **Supplementary Fig. 4. Forest plots depicting hazard ratios for different metastatic organs across different patient-reported outcomes.** Circles indicate hazard ratios, with bars representing 95% confidence intervals. Data in this analysis are patients with available metastatic sites information from the CA012-0 (N = 219) and EFC6089 (N = 213) studies.
